# Supplementary material
Source: publisher figshare collection journal article supplement (https://acs.figshare.com/ndownloader/files/4654732)
Supplement: Supplementary file 1 [file 4654732]

## Supporting Information

### Photolytic Control and Infrared Probing of Amide I Mode in the Dipeptide Backbone-Caged with the 4,5-Dimethoxy-2-nitrobenzyl Group

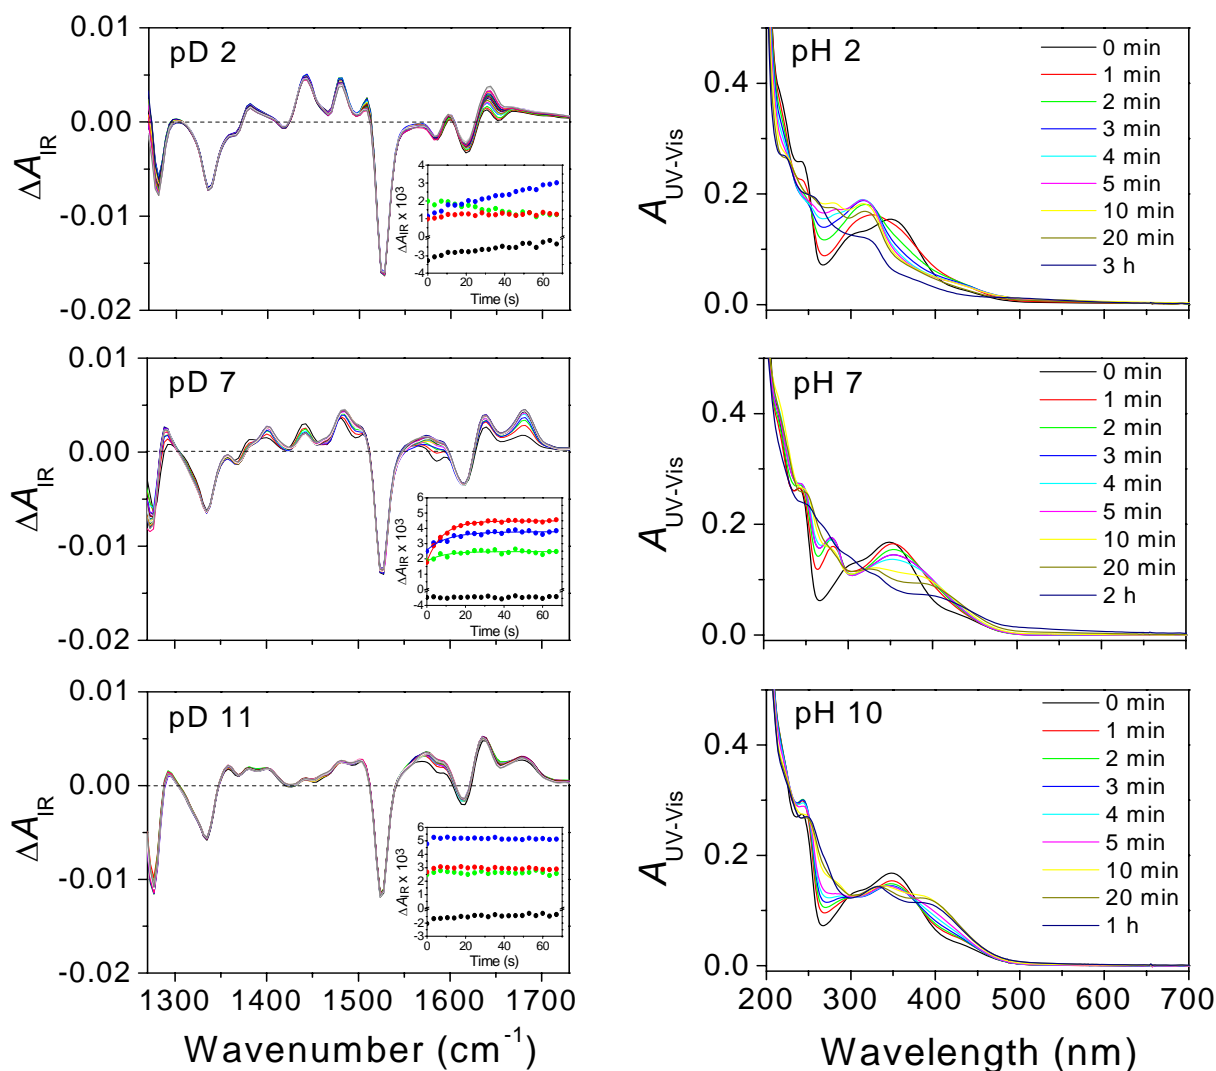

**Figure S1.** (Left) pD-dependence of the time-resolved IR spectra of **1** irradiated with a pulsed UV laser. The spectra were obtained under the same experimental conditions as those in Figure 4, with the exception of varying pD. Dashed lines correspond to  $\Delta A = 0$ . The insets show the kinetic traces of IR absorption change ( $\Delta A$ ) taken at four peak frequencies, 1505 (green), 1617 (black), 1635 (blue), and 1681 (red)  $\text{cm}^{-1}$ , from the time-resolved IR spectra. Experimental data (closed circles) at pD 7 are fitted to a single exponential function ( $\Delta A = \Delta A_0 + a_1 \exp(-t/\tau_1)$ , solid curves) with  $\tau_1$ ,  $a_1$ , and  $\Delta A_0$  values of Figure 4b. At pD 11, all four peaks show instantaneous changes, whereas slow rise components appear at pD 7 and 2. At pD 2, the extent of a slow component is more substantial and the band at 1635  $\text{cm}^{-1}$  is even blue-shifted to 1643  $\text{cm}^{-1}$ . (Right) pH-dependence of the steady-state UV-vis absorption spectra of **1** irradiated with a cw UV lamp. The spectra were recorded after **1** (ca. 30  $\mu\text{M}$ , 1 cm path length) in  $\text{H}_2\text{O}$  (15 mM sodium phosphate, pH 2, 7, or 10) was exposed to varying irradiation time with a cw UV lamp (365 nm, 30  $\text{mW}/\text{cm}^2$ , Spectroline). The photolysis progress as irradiation time was monitored on an UV-vis spectrophotometer. No well-defined isosbestic point is shown at all the pH and the spectral changes are strongly pH dependent.
